# Supplementary material for: A new class of fluorinated 5-pyrrolidinylsulfonyl isatin caspase inhibitors for PET imaging of apoptosis
Source: Royal Society of Chemistry journal article supplement (doi:10.1039/c2md20249b), 2012-11-12
Supplement: c2md20249b.pdf [file c2md20249b.pdf]

1 **Electronic Supplementary Information-**  
2 **A new class of fluorinated 5-pyrrolidinylsulfonyl isatin caspase**  
3 **inhibitors for PET imaging of apoptosis**

4

5

6 Anwen M. Krause-Heuer,<sup>a</sup> Nicholas R. Howell,<sup>a</sup> Lidia Matesic,<sup>a</sup> Geetanjali Dhand,<sup>a</sup> Emma L.  
7 Young,<sup>a</sup> Leena Burgess,<sup>a</sup> Cathy D. Jiang,<sup>a</sup> Nigel A. Lengkeek,<sup>a</sup> Christopher J. R. Fookes,<sup>a</sup>  
8 Tien Q. Pham,<sup>a</sup> Franck Sobrio,<sup>b</sup> Ivan Greguric,<sup>a</sup> Benjamin H. Fraser<sup>a\*</sup>

9

10

11 <sup>a\*</sup> *LifeSciences Division, Australian Nuclear Science and Technology Organisation,*  
12 *Locked Bag 2001, Kirrawee DC NSW 2232, Australia.*

13 *Fax: +61 2 9717 9262; Tel: +61 2 9717 3887;*

14 *E-mail: benjamin.fraser@ansto.gov.au*

15

16 <sup>b</sup> *CEA, I<sup>2</sup>BM, LDM-TEP, UMR 6302 ISTCT, GIP Cyceron,*  
17 *BP 5229, F-14074 Caen, France.*

## 18 1. Synthetic Chemistry

### 19 1.1. General methods

20 Nuclear magnetic resonance (NMR) spectra were recorded using a Bruker Avance DPX-400  
21 spectrometer operating at 400.13 MHz for  $^1\text{H}$  NMR and at 100.61 MHz for  $^{13}\text{C}$  NMR. Low-  
22 resolution mass spectrometry (LR-MS) was performed on a Micromass ZQ quadrupole mass  
23 spectrometer, and high-resolution mass spectrometry (HR-MS) was performed at the  
24 University of Wollongong, Australia using a Bruker Daltonics BioApex-II 7T FTICR  
25 spectrometer equipped with an off-axis analytical electron spray ionisation source. Flash  
26 chromatography was performed on a Reveleris® Flash Chromatography System (Grace  
27 Davison Discovery Sciences, Rowville, Australia), fitted with an ELSD (isopropanol support)  
28 and dual-wavelength UV (254 and 280 nm) detectors; solvent systems, column sizes and  
29 flow-rates are described where appropriate. Microanalysis was performed by the Campbell  
30 Microanalytical Laboratory, Chemistry Department, University of Otago, Dunedin, New  
31 Zealand. HPLC purity analysis was performed using a Waters Empower 2 system with a  
32 Waters 600 pump, Waters in-line degasser AF, Waters temperature control module II, Waters  
33 717 autosampler and Waters 2996 PDA. Either an Alltech Alltima C18 (150 × 4.6 mm, 5  $\mu\text{m}$   
34 pore size) or Waters XTerraRP (150 × 4.6 mm, 5  $\mu\text{m}$  pore size) analytical column was used,  
35 with absorbance measured at 210 nm or 254 nm. Samples were prepared as 1 mg/mL, with a  
36 10  $\mu\text{L}$  injection. Solvent conditions were as follows:

| Entry | Time | Flow (mL/min) | %A<br>(MeCN or MeOH) | %B<br>(H <sub>2</sub> O) | %C<br>(100 mM NH <sub>4</sub> HCO <sub>3</sub><br>pH 8 or 1% TFA) |
|-------|------|---------------|----------------------|--------------------------|-------------------------------------------------------------------|
| 1     | 0    | 1.00          | 10                   | 80                       | 10                                                                |
| 2     | 20   | 1.00          | 90                   | 0                        | 10                                                                |
| 3     | 21   | 1.00          | 10                   | 80                       | 10                                                                |

37 Percentage chemical purity was calculated from the peak area under using Empower software  
38 (Waters). logP was determined using a Waters Empower 2 system with a Waters 600 pump,  
39 Waters in-line degasser AF, Waters 717 autosampler and Waters 2487 detector. A Waters  
40 XTerra RP18 (150 × 4.6 mm, 5  $\mu\text{m}$  pore size) column was used, with methanol and potassium  
41 phosphate buffer (pH 7.5, 0.1 M) as mobile phase. The linear regression plot of retention time  
42 vs. logP for sample and standards (see table) was used to calculate the logP of unknown  
43 compounds.<sup>1</sup>

| Standard         | logP |
|------------------|------|
| aniline          | 0.98 |
| benzene          | 2.13 |
| bromobenzene     | 2.99 |
| ethylbenzene     | 3.15 |
| trimethylbenzene | 3.58 |

### 44 1.2. Materials

45 Isatin-5-sulfonic acid sodium salt dihydrate, tetramethylene sulfone (sulfolane), phosphorous  
46 oxychloride, 4-fluorobenzyl bromide, 4-chlorobenzyl bromide, 4-iodobenzyl bromide, 4-

47 bromobenzyl bromide, 4-methoxybenzyl chloride, 4-nitrobenzyl bromide, potassium  
48 carbonate, sodium hydride (60% in mineral oil), potassium iodide, trifluoroacetic acid,  
49 chloroacetyl chloride, phosphorous pentachloride and benzylamine were purchased from  
50 Sigma Aldrich. (*S*)-2-Pyrrolidinemethanol, 2-nitrobenzyl bromide, 3-nitrobenzyl bromide and  
51 4-hydroxy benzaldehyde were purchased from Alfa Aesar (BioScientific, Sydney, Australia).  
52 Triethylamine, benzyl bromide, 2-iodobenzyl bromide, 3-iodobenzyl bromide and Di-*tert*-  
53 butyl dicarbonate (Boc<sub>2</sub>O) were purchased from Lancaster (Morecambe, UK). 1-Bromo-2-  
54 fluoroethane was purchased from Matrix Scientific. 2-Boc-hexahydropyrrolo[3,4-*c*]pyrrole  
55 (**27**) was purchased from Synnovator, Inc (Raleigh, NC, USA). Deuterated solvents were  
56 purchased from Cambridge Isotope Laboratories (Novachem, Collingwood, Australia). All  
57 commercial materials were used as received. Unless otherwise stated all solvents used were  
58 HPLC grade or were dried using the MBraun MB SPS-800 solvent purification system.

### 59 **1.3. Synthesis of literature standards**

60 (*S*)-1-(2-Fluoroethoxybenzyl)-5-(2-(phenoxyethyl)pyrrolidin-1-ylsulfonyl)1*H*-indole-2,3-  
61 dione (**5**), (*S*)-1-(2-fluoroethoxybenzyl)-5-(2-(methoxymethyl)pyrrolidin-1-ylsulfonyl)1*H*-  
62 indole-2,3-dione (**6**) and (*S*)-1-(2-methoxybenzyl)-5-(2-(methoxymethyl)pyrrolidin-1-  
63 ylsulfonyl)1*H*-indole-2,3-dione (**7**) were synthesised according to the method of Kopka *et al.*  
64 and gave <sup>1</sup>H NMR data consistent with that reported in the literature.<sup>2</sup> These compounds were  
65 used in the enzyme assays for method validation.

### 66 **1.4. Synthesis of fluoromethyl pyrrolidinylsulfonyl isatin series**

#### 67 **1.4.1. (*S*)-*tert*-Butyl-2-[(hydroxy)methyl]pyrrolidine-1-carboxylate (**9**)**

68 (*S*)-*tert*-Butyl-2-[(hydroxy)methyl]pyrrolidine-1-carboxylate (**9**) was synthesised using an  
69 adaptation of a published method<sup>3</sup> and gave <sup>1</sup>H NMR data consistent with that reported in the  
70 literature.<sup>3, 4</sup> (*S*)-2-Pyrrolidinemethanol (**8**, 7.60 g, 75.9 mmol, 1 eq.) and triethylamine (8.60  
71 g, 85.0 mmol, 1.12 eq.) were dissolved in CH<sub>2</sub>Cl<sub>2</sub> (100 mL) in an ice bath. Di-*tert*-butyl  
72 dicarbonate (Boc<sub>2</sub>O, 17.1 g, 78.4 mmol, 1.03 eq.) was dissolved in CH<sub>2</sub>Cl<sub>2</sub> (50 mL) and added  
73 dropwise over ~ 40 min. The solution was stirred at room temperature (RT) for 16 h. The  
74 solution was extracted with cold HCl (1 M, 100 mL), washed with a saturated solution of  
75 NaHCO<sub>3</sub> (40 mL), dried (MgSO<sub>4</sub>) and evaporated to yield the *title compound* **9** as a yellow  
76 oil, which was recrystallised from hexane, to yield a white solid (11.2 g, 73%). <sup>1</sup>H NMR (400  
77 MHz, CDCl<sub>3</sub>): δ (ppm) 4.73 (br s, 1H), 3.97 (m, 1H), 3.61 (m, 2H), 3.46-3.31 (m, 2H), 2.00  
78 (m, 2H), 1.81 (m, 2H), 1.48 (s, 9H).

#### 79 **1.4.2. (*S*)-*tert*-Butyl-2-[(tosyloxy)methyl]pyrrolidine-1-carboxylate (**10**)**

80 (*S*)-*tert*-Butyl-2-[(tosyloxy)methyl]pyrrolidine-1-carboxylate (**10**) was synthesised according  
81 to the method of Podichetty *et al.* and gave spectroscopic data consistent with that reported in  
82 the literature.<sup>5, 6</sup> <sup>1</sup>H NMR (400 MHz, CDCl<sub>3</sub>): δ (ppm) 7.77 (d, *J* = 8.40 Hz, 2H), 7.34 (d, 2H,  
83 *J* = 6.00 Hz), 4.19-3.85 (m, 3H), 3.39-3.21 (m, 2H), 2.44 (s, 3H), 2.04-1.73 (m, 4H), 1.39 (br,  
84 9H).

85 **1.4.3. (S)-tert-Butyl 2-[(fluoro)methyl]pyrrolidine-1-carboxylate (11)**

86 Tosylate (**10**) (14.0 g, 39.4 mmol) and Bu<sub>4</sub>NF (50.0 mL, 1 M in THF, 50.0 mmol, 1.27 eq.)  
87 were combined in a round bottom flask and heated to reflux for 16 h. The THF was then  
88 removed under reduced pressure and the residue purified using automated flash  
89 chromatography (Grace 80 g silica column; 0-20% ethyl acetate/petroleum spirit gradient  
90 over 15 column volumes). The *title compound* **11** was obtained as a colourless oil (6.2 g,  
91 78%). <sup>1</sup>H NMR (400 MHz, CDCl<sub>3</sub>): δ (ppm) 4.56-4.15 (m, 2H), 4.01-3.83 (m, 1H), 3.42-3.21  
92 (m, 2H), 2.02-1.73 (m, 4H), 1.42 (s, 9H). <sup>13</sup>C NMR (100 MHz, CDCl<sub>3</sub>): δ (ppm) 157.5, 83.6  
93 (*J* = 175.4 Hz), 79.6, 56.5 (*J* = 22.7 Hz), 49.7 (*J* = 39.6 Hz), 28.5, 27.8 (*J* = 84.9 Hz), 23.5 (*J*  
94 = 97.8 Hz). HPLC Purity (MeOH/H<sub>2</sub>O/0.1% TFA): 100%, 19.45 min. LRMS (ES<sup>+</sup>, 40 V) *m/z*  
95 [M + Na]<sup>+</sup> C<sub>10</sub>H<sub>18</sub>FNNaO<sub>2</sub>: calculated 226.12; found 226.06. HRMS (TOF MS AP<sup>+</sup>) *m/z* [M +  
96 Na]<sup>+</sup> C<sub>10</sub>H<sub>18</sub>FNNaO<sub>2</sub>: calculated 226.1219, found 226.1219.

97 **1.4.4. 2,3-Dioxindoline-5-sulfonyl chloride (12)**

98 2,3-Dioxindoline-5-sulfonyl chloride (**12**) was synthesised using a modified procedure from  
99 the literature.<sup>7, 8</sup> A mixture of isatin-5-sulfonic acid sodium salt dihydrate (10.0 g, 35.1 mmol,  
100 1 eq.) was dissolved in tetramethylene sulfone (50 mL) to this was added phosphorous  
101 oxychloride (18.5 mL, 198 mmol, 5.6 eq.) was added dropwise. The mixture was heated at 60  
102 °C for 3 h under a dry nitrogen atmosphere. The reaction was allowed to cool to RT and was  
103 added dropwise to a stirring slurry of crushed ice/CH<sub>2</sub>Cl<sub>2</sub>. After the ice had melted, the  
104 mixture was separated and the organic layer retained, from which the CH<sub>2</sub>Cl<sub>2</sub> removed by  
105 evaporation. diluted with ethyl acetate (500 mL), washed with H<sub>2</sub>O (10 × 200 mL), dried  
106 (MgSO<sub>4</sub>) and evaporated to dryness to yield the *title compound* **12** as a bright yellow solid,  
107 which by NMR showed the presence of small amounts of residual tetramethylene sulfone.  
108 The material was used in the following steps without further purification (6.5 g, 75%). <sup>1</sup>H  
109 NMR (400 MHz, *d*<sub>6</sub>-DMSO): δ (ppm) 11.12 (s, 1H), 7.81 (dd, 1H, *J*<sub>1</sub> = 8.09 Hz, *J*<sub>2</sub> = 1.57  
110 Hz), 7.59 (d, 1H, *J* = 1.49 Hz), 6.87 (d, 1H, *J* = 8.06 Hz).

111 **1.4.5. (S)-5-[1-(2-(Fluoromethyl)pyrrolidine-1-ylsulfonyl)1*H*-indole-2,3-**  
112 **dione (13)**

113 The Boc-protected fluorinated pyrrolidine (**11**) (3.32 g, 16.35 mmol) was dissolved in CH<sub>2</sub>Cl<sub>2</sub>  
114 (5 mL) and TFA (32.8 mmol, 2.5 mL) was added at RT. The solution was stirred for 16 h  
115 after which the TFA was removed under pressure to yield the crude trifluoroacetic acid salt  
116 which was immediately dissolved in chloroform/THF (30 mL) and then *N,N*-  
117 diisopropylethylamine (49 mmol, 6.33 g, 8.7 mL) and 2,3-dioxindoline-5-sulfonyl chloride  
118 (**12**) (32.7 mmol, 8.03 g) were added. The solution was stirred at RT for 15 h; after which  
119 saturated aqueous NH<sub>4</sub>Cl (50 mL) was added. The aqueous phase was separated from the  
120 organic phase and extracted with CH<sub>2</sub>Cl<sub>2</sub> (3 × 25 mL). The combined organic extracts were  
121 dried (MgSO<sub>4</sub>), filtered and the solvent removed under reduced pressure to give a crude  
122 green/orange oil that was purified using a Grace Reveleris medium pressure liquid  
123 chromatography system (Grace 40 g silica column; 10% ethyl acetate/petroleum spirit over 2  
124 column volumes, increase to 65% over 8 column volumes, 65% over 6 column volumes). The  
125 *title compound* **13** was obtained as a yellow solid (5.1 g, 51%). <sup>1</sup>H NMR (400 MHz, *d*<sub>6</sub>-

126 acetone):  $\delta$  (ppm) 8.14 (dd, 1H,  $J_1 = 8.3$  Hz,  $J_2 = 1.9$  Hz), 7.96 (d, 1H,  $J = 1.8$  Hz), 7.28 (d,  
127 1H,  $J = 8.3$  Hz), 4.51 (m, 2H), 3.89 (m, 1H), 3.43 (m, 1H), 3.23 (m, 1H), 1.90 (m, 2H), 1.77  
128 (m, 1H), 1.65 (m, 1H).  $^{13}\text{C}$  NMR (100 MHz,  $d_6$ -acetone):  $\delta$  (ppm) 205.1, 193.9, 123.5, 112.6,  
129 85.2, 83.5, 84.4 ( $J = 170.7$  Hz), 58.6 ( $J = 22.6$  Hz), 49.0, 27.4 ( $J = 3.0$  Hz), 23.5. HPLC Purity  
130 (MeCN/H<sub>2</sub>O/100 mM NH<sub>4</sub>HCO<sub>3</sub> pH 8): 97.68%, 14.92 min; (MeOH/H<sub>2</sub>O/100 mM NH<sub>4</sub>HCO<sub>3</sub>  
131 pH 8): 99.30%, 17.88 min. LRMS (ES<sup>+</sup>, 40 V)  $m/z$  [M + H]<sup>+</sup> C<sub>13</sub>H<sub>14</sub>FN<sub>2</sub>O<sub>4</sub>S: calculated  
132 313.07; found 312.96. HRMS (TOF MS AP<sup>+</sup>)  $m/z$  [M + H]<sup>+</sup> C<sub>13</sub>H<sub>14</sub>FN<sub>2</sub>O<sub>4</sub>S: calculated  
133 313.0658, found 313.0668. Calc C<sub>15</sub>H<sub>17</sub>FN<sub>2</sub>O<sub>5</sub>S C: 50.55, H: 4.81, N: 7.86; found C: 50.96,  
134 H: 4.46, N: 8.67.

#### 135 1.4.6. 1-(Chloromethyl)-4-(2-fluoroethoxy)benzene (37)

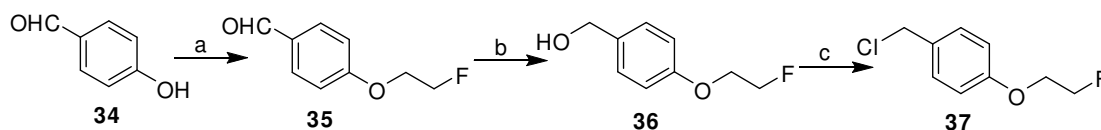

**Scheme 1.** (a) K<sub>2</sub>CO<sub>3</sub>, 1-bromo-2-fluoroethane; (b) NaBH<sub>4</sub>; (c) HCl.

#### 138 1.4.6.1. 4-(2-Fluoroethoxy)benzaldehyde (35)

139 4-Hydroxybenzaldehyde (**34**, 1.00 g, 8.19 mmol) and K<sub>2</sub>CO<sub>3</sub> (2.83 g, 20.5 mmol) were  
140 dissolved in dry DMF (40 mL) and heated at 80 °C for 10 min. 1-Bromo-2-fluoroethane (1.87  
141 g, 1.10 mL, 14.7 mmol) was then added and the reaction mixture stirred at 80 °C for 4 h. H<sub>2</sub>O  
142 (200 mL) was added and the mixture was extracted with 3 × 100 mL CH<sub>2</sub>Cl<sub>2</sub>, dried (MgSO<sub>4</sub>),  
143 filtered and evaporated to yield the *title compound* **35** as a white powder (1.33 g, 96%). <sup>1</sup>H  
144 NMR (400 MHz, CDCl<sub>3</sub>):  $\delta$  (ppm) 9.89 (s, 1H), 7.84 (dd, 2H,  $J_1 = 2.0$  Hz,  $J_2 = 8.8$  Hz), 7.03  
145 (dd, 2H,  $J_1 = 1.8$  Hz,  $J_2 = 8.8$  Hz), 4.79 (dt, 2H,  $J_1 = 47.4$  Hz,  $J_2 = 4.4$  Hz), 4.30 (dt, 2H,  
146  $J_1 = 27.4$  Hz,  $J_2 = 4.4$  Hz). The <sup>1</sup>H NMR spectral data was consistent with that previously  
147 reported in the literature.<sup>9</sup> LRMS (ES<sup>+</sup>, 40 V)  $m/z$  [M + H]<sup>+</sup> C<sub>9</sub>H<sub>10</sub>FO<sub>2</sub>: calculated 169.07;  
148 found 169.05.

#### 149 1.4.6.2. 4-(2-Fluoroethoxyphenyl) methanol (36)

150 The benzaldehyde (**35**) (13.8 g, 82.1 mmol) was dissolved in dry EtOH (100 mL) at RT.  
151 NaBH<sub>4</sub> (1.55 g, 41.1 mmol) was added portion-wise over 30 min and the reaction mixture  
152 stirred at RT for 2 h. H<sub>2</sub>O (100 mL) was added and the mixture was extracted with 2 × 150  
153 mL CHCl<sub>3</sub>, washed with brine (100 mL), dried (MgSO<sub>4</sub>), filtered and evaporated to yield the  
154 *title compound* **36** as pale yellow crystals (12.7 g, 91%). <sup>1</sup>H NMR (400 MHz, CDCl<sub>3</sub>):  $\delta$   
155 (ppm) 7.17 (d, 2H,  $J = 7.2$  Hz), 6.81 (d, 2H,  $J = 6.8$  Hz), 4.65 (dd, 2H,  $J_1 = 47.6$  Hz,  $J_2 = 4.4$   
156 Hz), 4.44 (s, 2H), 4.07 (dd, 2H,  $J_1 = 28.8$  Hz,  $J_2 = 3.6$  Hz).  $^{13}\text{C}$  NMR (100 MHz, CDCl<sub>3</sub>):  $\delta$   
157 (ppm) 157.3, 133.5, 128.1, 114.0, 81.6 ( $J = 168.0$  Hz), 66.7 ( $J = 20.0$  Hz), 63.6 ( $J = 2.0$  Hz).  
158 LRMS (ES<sup>-</sup>, 40 V)  $m/z$  [M - H]<sup>-</sup> C<sub>9</sub>H<sub>10</sub>FO<sub>2</sub>: calculated 169.07; found 169.09.

#### 159 1.4.6.3. 1-(Chloromethyl)-4-(2-fluoroethoxy)benzene (37)

160 The alcohol (**36**) (2.50 g, 14.7 mmol) was added to heptane (50 mL). 10 M HCl (19.1 mL,  
161 191 mmol) was added and the reaction mixture shaken vigorously for 5 min and left to settle  
162 for another 5 min. The heptane layer was separated and the aqueous layer was extracted with  
163 2 × 25 mL heptane. The combined organic extracts were dried (MgSO<sub>4</sub>), filtered and  
164 evaporated to yield the *title compound* **37** as a colourless oil (2.31 g, 83%). <sup>1</sup>H NMR (400  
165 MHz, CDCl<sub>3</sub>):  $\delta$  (ppm) 7.33 (d, 2H,  $J = 8.4$  Hz), 6.91 (d, 2H,  $J = 8.4$  Hz), 4.76 (dt, 2H,  $J_1 =$   
166 47.6 Hz,  $J_2 = 4.4$  Hz), 4.57 (s, 2H), 4.22 (dt, 2H,  $J_1 = 27.6$  Hz,  $J_2 = 4.0$  Hz).  $^{13}\text{C}$  NMR (100

167 MHz, CDCl<sub>3</sub>):  $\delta$  (ppm) 158.5, 130.3, 130.1, 114.8, 81.8 ( $J = 170.0$  Hz), 67.1 ( $J = 20.0$  Hz),  
168 46.1. LRMS (ES<sup>-</sup>, 40 V)  $m/z$  [M - Cl]<sup>-</sup> C<sub>9</sub>H<sub>10</sub>FO: calculated 153.07, found 153.04.

169 **1.4.7. Synthesis of alkylating agent 1-benzyl-5-(chloromethyl)-1H-tetrazole**  
170 **(41)**

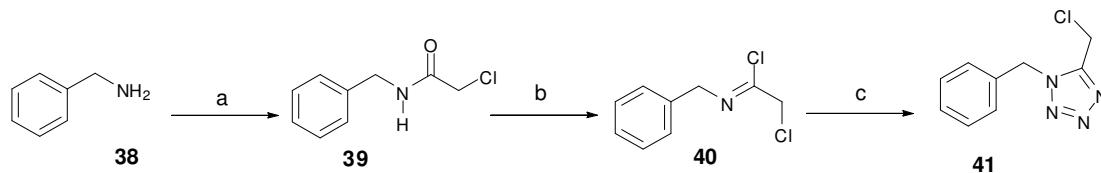

171 **Scheme 2.** (a) Chloroacetylchloride; (b) POCl<sub>5</sub>; (c) HN<sub>3</sub>.

172

173  
174 **1.4.7.1. N-Benzyl-2-chloroacetamide (39)**

175 *N*-Benzyl-2-chloroacetamide was prepared according to the literature method of Touti *et al.*<sup>10</sup>  
176 Chloroacetylchloride (17 mL, 220 mmol) was added dropwise to a mechanically stirred  
177 solution of benzylamine (38, 48 mL, 440 mmol, 2 eq.) in toluene (350 mL) at 0 °C resulting in  
178 the formation of a white precipitate. After 1 h the reaction was quenched with H<sub>2</sub>O (600 mL).  
179 The precipitate was dissolved by the addition of ethyl acetate (500 mL). The phases were  
180 separated and the aqueous phase was extracted with ethyl acetate (3 × 250 mL). The organic  
181 fractions were combined, dried (MgSO<sub>4</sub>), filtered and concentrated before being recrystallised  
182 from toluene to yield the *title compound* 39 as fine white crystals (27 g, 68%). <sup>1</sup>H NMR (400  
183 MHz, CDCl<sub>3</sub>):  $\delta$  (ppm) 7.30 (m, 5H), 6.89 (br s, 1H), 4.49 (m, 2H), 4.10 (s, 2H).

184 **1.4.7.2. 1-benzyl-5-(chloromethyl)-1H-tetrazole (41)**

185 Step 1) 1-benzyltetrazol-5ylchloromethane was prepared according to the literature method of  
186 Touti *et al.*<sup>10</sup> 39 (5.2 g, 28.3 mmol) was suspended in toluene (100 mL) that was cooled to 5  
187 °C with an ice bath and phosphorus pentachloride (6.5 g, 31.2 mmol) was added. The bath  
188 was removed and the reaction brought to RT. The yellow/orange solution was then heated to  
189 60 °C under reduced pressure in order to remove HCl and reduce the volume by half. Nitrogen  
190 gas was then bubbled through the remaining solution in order to displace any remaining HCl  
191 leaving a crude solution of *N*-benzyl-2-chloroacetimidoyl chloride (40), which was used  
192 without purification.

193 Step 2) Concentrated sulphuric acid (12.5 mL) was added dropwise to a stirred solution of  
194 sodium azide (4.25 g, 65 mmol) in H<sub>2</sub>O (5 mL) overlaid with toluene (25 mL). The phases  
195 were separated and the aqueous layer extracted with toluene (2 × 10 mL). The combined  
196 organic extracts were dried over MgSO<sub>4</sub>. This solution of HN<sub>3</sub> (CAUTION! HN<sub>3</sub> is highly  
197 toxic, use with extreme care) was then added dropwise to the solution of 40 prepared in the  
198 previous step and stirred overnight at RT in a well-ventilated fumehood. Nitrogen gas  
199 was bubbled through the solution for 1 h to drive off hydrazoic acid. Any remaining hydrazoic  
200 acid and toluene were then removed under reduced pressure. Ice was added to the brown  
201 crude oil and allowed to melt before being heated to reflux for 30 min then extracted with  
202 ethyl acetate (3 × 40 mL). The organic extracts were dried (MgSO<sub>4</sub>) and concentrated to give  
203 a brown oil. This oil was purified by LPLC using a gradient of 18-87% ethyl  
204 acetate/petroleum spirit to yield the *title compound* 41 as a white solid (4.0 g, 68%). <sup>1</sup>H NMR  
205 (400 MHz, CDCl<sub>3</sub>):  $\delta$  (ppm) 7.35 (m, 5H), 5.68 (s, 2H), 4.61 (s, 2H).

206 **1.4.8. General procedure for the synthesis of *N*-alkylated isatin derivatives**

207 (*S*)-5-[1-(2-(Fluoromethyl)pyrrolidine-1-ylsulfonyl)1*H*-indole-2,3-dione (**13**, ~100 mg, 320  
208  $\mu\text{mol}$ , 1 eq.) was dissolved in dry DMF (5-10 mL). Under a dry nitrogen atmosphere,  $\text{K}_2\text{CO}_3$   
209 (1.4 eq.) was added, causing the solution to become dark purple in colour. After 10 min the  
210 corresponding alkyl halide (2 eq.) and a catalytic quantity of KI (~ 5 mg) were added and the  
211 mixture stirred at 60 °C for 16 h, with the reaction becoming yellow/orange in colour over  
212 approximately 1 h. The mixture was acidified with HCl (1 M) and diluted with  $\text{H}_2\text{O}$  (25 mL).  
213 The product was extracted into ethyl acetate (50 mL) and washed with brine (2  $\times$  50 mL). The  
214 organic layer was dried ( $\text{MgSO}_4$ ), concentrated and purified using automated flash  
215 chromatography (Grace 4 g silica column; 10% ethyl acetate/petroleum spirit over 2 column  
216 volumes, increase to 50% over 12 column volumes, 50% over 6 column volumes).

217  
218 **(*S*)-1-(2-Fluoroethoxybenzyl)-5-(2-(fluoromethyl)pyrrolidin-1-ylsulfonyl)1*H*-indole-2,3-**  
219 **dione (**14**)**

220 **14** was prepared using the general method as described in 1.4.8. **13** (58.0 mg, 186  $\mu\text{mol}$ ) was  
221 alkylated with **37** (49.0 mg, 260  $\mu\text{mol}$ ) to yield the *title compound 14* as orange crystals (86.4  
222 mg, 75%).  $^1\text{H}$  NMR (400 MHz,  $\text{CDCl}_3$ ):  $\delta$  (ppm) 8.03 (d, 1H,  $J = 1.6$  Hz), 7.98 (dd, 1H,  $J_1 =$   
223 8.4 Hz,  $J_2 = 2.0$  Hz), 7.28 (m, 2H), 6.92 (m, 3H), 4.91 (s, 2H), 4.75 (m, 2H), 4.46 (m, 2H),  
224 4.21 (m, 2H), 3.80 (m, 1H), 3.43 (m, 1H), 3.12 (m, 1H), 1.94 (m, 2H), 1.72 (m, 2H).  $^{13}\text{C}$   
225 NMR (100 MHz,  $\text{CDCl}_3$ ):  $\delta$  (ppm) 181.8, 158.6, 157.9 ( $J = 28.0$  Hz), 153.5, 137.4, 133.8,  
226 128.6, 126.3, 124.5, 117.6, 114.7, 111.3, 84.4 ( $J = 173.0$  Hz), 81.8 ( $J = 170.0$  Hz), 67.2 ( $J =$   
227 20.0 Hz), 58.8 ( $J = 23.0$  Hz), 49.3, 44.0, 28.2, 24.1. HPLC Purity (MeCN/ $\text{H}_2\text{O}$ /0.1% TFA):  
228 96.86%, 20.31 min; (MeOH/ $\text{H}_2\text{O}$ /0.1% TFA): 86.35%, 21.81 min. LRMS ( $\text{ES}^-$ , 40 V)  $m/z$  [ $\text{M}$   
229 - H] $^-$   $\text{C}_{22}\text{H}_{21}\text{F}_2\text{N}_2\text{O}_5\text{S}$ : calculated 463.11; found 463.15. HRMS (TOF MS  $\text{AP}^+$ )  $m/z$  [ $\text{M} + \text{H}$ ] $^+$   
230  $\text{C}_{22}\text{H}_{23}\text{H}_2\text{N}_2\text{O}_5\text{S}$ : calculated 465.1296; found 465.1306. Calc  $\text{C}_{22}\text{H}_{22}\text{F}_2\text{N}_2\text{O}_5\text{S}$  C: 56.89, H:  
231 4.77, N: 6.90; found C: 56.93, H: 5.14, N: 4.35.

232  
233 **(*S*)-1-(Benzyl)-5-(2-(fluoromethyl)pyrrolidin-1-ylsulfonyl)1*H*-indole-2,3-dione (**15**)**

234 **15** was prepared using the general method as described in 1.4.8. **13** (100 mg, 320  $\mu\text{mol}$ ) was  
235 alkylated with benzyl bromide (110 mg, 640  $\mu\text{mol}$ ) to yield the *title compound 15* as a  
236 yellow/orange solid (74 mg, 56%).  $^1\text{H}$  NMR (400 MHz,  $\text{CDCl}_3$ ):  $\delta$  (ppm) 8.05 (d,  $J = 1.74$   
237 Hz, 1H), 7.98 (dd,  $J_1 = 8.35$  Hz,  $J_2 = 1.88$  Hz, 1H), 7.36 (m, 5H), 6.93 (d,  $J = 8.40$  Hz, 1H),  
238 4.98 (s, 2H), 4.57-4.35 (m, 2H), 3.81 (m, 1H), 3.43 (m, 1H), 3.12 (m, 1H), 1.93 (m, 2H), 1.74  
239 (m, 2H).  $^{13}\text{C}$  NMR (100 MHz,  $\text{CDCl}_3$ ):  $\delta$  (ppm) 181.7, 157.8, 153.5, 137.4, 133.8, 133.7,  
240 129.3, 128.6, 127.6, 124.5, 117.6, 111.3, 84.4 ( $J = 173.5$  Hz), 58.8 ( $J = 23.4$  Hz), 49.3, 44.5,  
241 28.2 ( $J = 2.2$  Hz), 24.2. HPLC Purity (MeCN/ $\text{H}_2\text{O}$ /100 mM  $\text{NH}_4\text{HCO}_3$  pH 8): 96.20%, 19.78  
242 min; (MeOH/ $\text{H}_2\text{O}$ /100 mM  $\text{NH}_4\text{HCO}_3$  pH 8): 94.98%, 21.68 min. LRMS ( $\text{ES}^+$ , 40 V)  $m/z$  [ $\text{M}$   
243 + Na] $^+$   $\text{C}_{20}\text{H}_{19}\text{FN}_2\text{NaO}_4\text{S}$ : calculated 425.09; found 424.90. HRMS (TOF MS  $\text{AP}^+$ )  $m/z$  [ $\text{M} +$   
244 H] $^+$   $\text{C}_{20}\text{H}_{20}\text{FN}_2\text{O}_4\text{S}$ : calculated 403.1128 found 403.1103. Calc  $\text{C}_{20}\text{H}_{19}\text{FN}_2\text{O}_4\text{S}$  C: 59.69, H:  
245 4.76, N: 6.96; found C: 59.81, H: 4.89, N: 6.72.

246  
247

248 **(S)-1-(4-Bromobenzyl)-5-(2-(fluoromethyl)pyrrolidin-1-ylsulfonyl)1H-indole-2,3-dione**  
249 **(16)**

250 **16** was prepared using the general method as described in 1.4.8. **13** (100 mg, 320  $\mu\text{mol}$ ) was  
251 alkylated with 4-bromobenzyl bromide (160 mg, 640  $\mu\text{mol}$ ) to yield the *title compound 16* as  
252 a yellow/orange solid (38 mg, 25%).  $^1\text{H}$  NMR (400 MHz,  $\text{CDCl}_3$ ):  $\delta$  (ppm) 8.07 (d,  $J = 1.61$   
253 Hz, 1H), 8.01 (dd,  $J_1 = 8.29$  Hz,  $J_2 = 1.87$  Hz, 1H), 7.52 (m, 2H), 7.23 (m, 2H), 6.90 (d,  $J =$   
254 8.37 Hz, 1H) 4.93 (s, 2H), 4.57-4.36 (m, 2H), 3.83 (m, 1H), 3.43 (m, 1H), 3.13 (m, 1H), 1.94  
255 (m, 2H), 1.75 (m, 2H).  $^{13}\text{C}$  NMR (100 MHz,  $\text{CDCl}_3$ ):  $\delta$  (ppm) 181.5, 157.8; 153.2, 137.5,  
256 134.3, 132.8, 132.6, 129.3, 124.7, 117.7, 111.2, 84.5 ( $J = 175.8$  Hz), 58.9 ( $J = 22.5$  Hz), 49.4,  
257 44.0, 28.3 ( $J = 2.2$  Hz), 24.29. HPLC Purity (MeCN/ $\text{H}_2\text{O}$ /100 mM  $\text{NH}_4\text{HCO}_3$  pH 8): 95.67%,  
258 20.04 min; (MeOH/ $\text{H}_2\text{O}$ /100 mM  $\text{NH}_4\text{HCO}_3$  pH 8): 98.44%, 22.61 min. LRMS ( $\text{ES}^+$ , 40 V)  
259  $m/z$   $[\text{M} + \text{H}]^+$   $\text{C}_{20}\text{H}_{19}\text{BrFN}_2\text{O}_4\text{S}$ : calculated 481.02; found 480.81. HRMS (TOF MS  $\text{AP}^+$ )  $m/z$   
260  $[\text{M} + \text{H}]^+$   $\text{C}_{20}\text{H}_{19}\text{BrFN}_2\text{O}_4\text{S}$ : calculated 481.0233; found 481.0251. Calc  $\text{C}_{20}\text{H}_{18}\text{BrFN}_2\text{O}_4\text{S}$ : C:  
261 49.91, H: 3.77, N: 5.82; found C: 50.36, H: 3.77, N: 5.66.

263 **(S)-1-(4-Chlorobenzyl)-5-(2-(fluoromethyl)pyrrolidin-1-ylsulfonyl)1H-indole-2,3-dione**  
264 **(17)**

265 **17** was prepared using the general method as described in 1.4.8. **13** (100 mg, 320  $\mu\text{mol}$ ) was  
266 alkylated with 4-chlorobenzyl bromide (132 mg, 640  $\mu\text{mol}$ ) to yield the *title compound 17* as  
267 a yellow/orange solid (60 mg, 43%).  $^1\text{H}$  NMR (400 MHz,  $\text{CDCl}_3$ ):  $\delta$  (ppm) 8.06 (d,  $J = 1.83$   
268 Hz, 1H), 8.01 (dd,  $J_1 = 8.35$  Hz,  $J_2 = 1.87$  Hz, 1H), 7.36 (m, 2H), 7.29 (m, 2H), 6.90 (d,  $J =$   
269 8.36 Hz, 1H) 4.94 (s, 2H), 4.57-4.36 (m, 2H), 3.82 (m, 1H), 3.43 (m, 1H), 3.14 (m, 1H), 1.95  
270 (m, 2H), 1.77 (m, 2H).  $^{13}\text{C}$  NMR (100 MHz,  $\text{CDCl}_3$ ):  $\delta$  (ppm) 181.6, 157.9, 153.3, 137.5,  
271 134.3, 134.8, 134.2, 132.3, 129.7, 129.1, 124.7, 117.7, 111.3, 94.4, 84.5 ( $J = 175.5$  Hz), 59.0  
272 ( $J = 22.9$  Hz), 49.4, 44.0, 28.3 ( $J = 2.6$  Hz), 24.3. HPLC Purity (MeCN/ $\text{H}_2\text{O}$ /100 mM  
273  $\text{NH}_4\text{HCO}_3$  pH 8): 97.53%, 19.71 min; (MeOH/ $\text{H}_2\text{O}$ /100 mM  $\text{NH}_4\text{HCO}_3$  pH 8): 99.20%, 22.05  
274 min. LRMS ( $\text{ES}^+$ , 40 V)  $m/z$   $[\text{M} + \text{H}]^+$   $\text{C}_{20}\text{H}_{19}\text{ClFN}_2\text{O}_4\text{S}$ : calculated 437.07; found 436.86.  
275 HRMS (TOF MS  $\text{AP}^+$ )  $m/z$   $[\text{M} + \text{H}]^+$   $\text{C}_{20}\text{H}_{19}\text{ClFN}_2\text{O}_4\text{S}$ : calculated 437.0738; found 437.0753.  
276 Calc  $\text{C}_{20}\text{H}_{18}\text{ClFN}_2\text{O}_4\text{S}$  C: 54.98, H: 4.15, N: 6.41; found C: 55.17, H: 4.22, N: 6.16.

278 **(S)-1-(4-Fluorobenzyl)-5-(2-(fluoromethyl)pyrrolidin-1-ylsulfonyl)1H-indole-2,3-dione**  
279 **(18)**

280 **18** was prepared using the general method as described in 1.4.8 **13** (100 mg, 320  $\mu\text{mol}$ ) was  
281 alkylated with 4-fluorobenzyl bromide (121 mg, 640  $\mu\text{mol}$ ) to yield the *title compound 18* as a  
282 yellow/orange solid (24 mg, 24%)  $^1\text{H}$  NMR (400 MHz,  $\text{CDCl}_3$ ):  $\delta$  (ppm) 8.06 (d,  $J = 1.84$  Hz,  
283 1H), 8.01 (dd,  $J_1 = 8.29$  Hz,  $J_2 = 1.90$  Hz, 1H), 7.33 (m, 2H), 7.07 (m, 2H), 6.93 (d,  $J = 8.21$   
284 Hz, 1H) 4.94 (s, 2H), 4.56-4.35 (m, 2H), 3.82 (m, 1H), 3.43 (m, 1H), 3.13 (m, 1H), 1.94 (m,  
285 2H), 1.74 (m, 2H).  $^{13}\text{C}$  NMR (100 MHz,  $\text{CDCl}_3$ ):  $\delta$  (ppm) 181.6, 164.0, 161.5, 157.7, 153.2,  
286 137.4, 134.0, 129.5 ( $J = 8.11$  Hz), 124.6, 117.6, 116.4 ( $J = 22.0$  Hz), 111.1, 84.4 ( $J = 176.0$   
287 Hz), 58.9 ( $J = 23.1$  Hz), 49.3, 43.8, 28.2 ( $J = 2.6$  Hz), 24.2. HPLC Purity (MeCN/ $\text{H}_2\text{O}$ /100  
288 mM  $\text{NH}_4\text{HCO}_3$  pH 8): 98.78%, 18.87 min; (MeOH/ $\text{H}_2\text{O}$ /100 mM  $\text{NH}_4\text{HCO}_3$  pH 8): 98.65%,  
289 20.91 min. LRMS ( $\text{ES}^+$ , 20 V)  $m/z$   $[\text{M} + \text{H}]^+$   $\text{C}_{20}\text{H}_{19}\text{F}_2\text{N}_2\text{O}_4\text{S}$ : calculated 421.10; found  
290 420.88. HRMS (TOF MS  $\text{AP}^+$ )  $m/z$   $[\text{M} + \text{H}]^+$   $\text{C}_{20}\text{H}_{19}\text{F}_2\text{N}_2\text{O}_4\text{S}$  calculated: 421.1034; found  
291 421.1044. Calc  $\text{C}_{20}\text{H}_{18}\text{F}_2\text{N}_2\text{O}_4\text{S}$  C: 57.14, H: 4.32, N: 6.66; found C: 57.33, H: 4.40, N: 6.45.



292 **(S)-1-(2-Iodobenzyl)-5-(2-(fluoromethyl)pyrrolidin-1-ylsulfonyl)1H-indole-2,3-dione (19)**  
293 **19** was prepared using the general method as described in 1.4.8, with slight modification. **13**  
294 (100 mg, 320  $\mu\text{mol}$ ) was alkylated with 2-iodobenzyl bromide (141 mg, 640  $\mu\text{mol}$ ).  
295 Additional alkylating reagent (70 mg, 320  $\mu\text{mol}$ ) was added after 16 h as the reaction was still  
296 slightly purple in colour. Purification yielded the *title compound 19* as a yellow/orange solid  
297 (45 mg, 27%).  $^1\text{H}$  NMR (400 MHz,  $\text{CDCl}_3$ ):  $\delta$  (ppm) 8.09 (d,  $J = 1.75$  Hz, 1H), 8.01 (dd,  $J_1 =$   
298 8.36 Hz,  $J_2 = 1.93$  Hz, 1H), 7.93 (dd,  $J_1 = 1.10$  Hz,  $J_2 = 7.99$  Hz, 1H), 7.32 (dt,  $J_1 = 1.64$  Hz,  
299  $J_2 = 7.80$  Hz, 1H), 7.11 (dd,  $J_1 = 1.42$  Hz,  $J_2 = 7.85$  Hz, 1H), 7.05 (m, 1H), 6.85 (d,  $J = 8.36$   
300 Hz, 1H) 5.05 (s, 2H); 4.60-4.33 (m, 2H), 3.84 (m, 1H), 3.43 (m, 1H), 3.15 (m, 1H), 1.94 (m,  
301 2H), 1.75 (m, 2H).  $^{13}\text{C}$  NMR (100 MHz,  $\text{CDCl}_3$ ):  $\delta$  (ppm) 181.7, 158.0, 153.4, 140.4, 137.7,  
302 135.5, 134.3, 130.4, 129.4, 127.5, 124.8, 117.8, 112.1, 98.0, 84.5 ( $J = 173.7$  Hz), 59.0  
303 ( $J = 23.1$  Hz), 49.5 ( $J = 16.6$  Hz), 28.3 ( $J = 2.8$  Hz), 24.4. HPLC Purity (MeCN/ $\text{H}_2\text{O}$ /0.1%  
304 TFA): 96.60%, 21.53 min; (MeOH/ $\text{H}_2\text{O}$ /100 mM  $\text{NH}_4\text{HCO}_3$  pH 8): 97.88%, 23.25 min.  
305 LRMS ( $\text{ES}^-$ , 40 V)  $m/z$   $[\text{M} + \text{Cl}]^-$   $\text{C}_{20}\text{H}_{18}\text{ClFIN}_2\text{O}_4\text{S}$ : calculated 562.97; found 562.87. HRMS  
306 (TOF MS  $\text{AP}^+$ )  $m/z$   $[\text{M} + \text{H}]^+$   $\text{C}_{20}\text{H}_{19}\text{FIN}_2\text{O}_4\text{S}$ : calculated 529.0096; found 529.0084. Calc  
307  $\text{C}_{20}\text{H}_{18}\text{FIN}_2\text{O}_4\text{S}$ : C: 45.47, H: 3.43, N: 5.30; found C: 46.01, H: 3.38, N: 5.28.

308  
309 **(S)-1-(3-Iodobenzyl)-5-(2-(fluoromethyl)pyrrolidin-1-ylsulfonyl)1H-indole-2,3-dione (20)**  
310 **20** was prepared using the general method as described in 1.4.8, with slight modification. **13**  
311 (100 mg, 320  $\mu\text{mol}$ ) was alkylated with 3-iodobenzyl bromide (132 mg, 640  $\mu\text{mol}$ ) to yield  
312 the *title compound 20* as a yellow/orange solid (60 mg, 40%).  $^1\text{H}$  NMR (400 MHz,  $\text{CDCl}_3$ ):  $\delta$   
313 (ppm) 8.08 (d,  $J = 1.8$  Hz, 1H), 8.02 (dd,  $J_1 = 8.4$  Hz,  $J_2 = 2.2$  Hz, 1H), 7.69 (m, 2H), 7.31 (d,  
314  $J = 7.6$  Hz, 1H), 7.124 (m, 1H), 6.919 (d,  $J = 8.3$  Hz, 1H) 4.914 (s, 2H), 4.599-4.328 (m, 2H),  
315 3.84 (m, 1H), 3.44 (m, 1H), 3.15 (m, 1H), 1.95 (m, 2H), 1.76 (m, 2H).  $^{13}\text{C}$  NMR (100 MHz,  
316  $\text{CDCl}_3$ ):  $\delta$  (ppm) 181.4, 157.7, 153.1, 137.8, 137.5, 136.1, 134.1, 131.0, 126.8, 124.6, 117.6,  
317 111.2, 95.1, 84.4 ( $J = 174.6$  Hz), 58.9 ( $J = 22.7$  Hz), 49.3, 43.7, 28.2 ( $J = 2.6$  Hz), 24.2.  
318 HPLC Purity (MeCN/ $\text{H}_2\text{O}$ /0.1% TFA): 99.46%, 21.47 min; (MeOH/ $\text{H}_2\text{O}$ /100 mM  $\text{NH}_4\text{HCO}_3$   
319 pH 8): 96.87%, 23.04 min. LRMS ( $\text{ES}^-$ , 40 V)  $m/z$   $[\text{M} + \text{Cl}]^-$   $\text{C}_{20}\text{H}_{18}\text{ClFIN}_2\text{O}_4\text{S}$ : calculated  
320 562.97; found 561.91. HRMS (TOF MS  $\text{AP}^+$ )  $m/z$   $[\text{M} + \text{Cl}]^+$   $\text{C}_{20}\text{H}_{18}\text{ClFIN}_2\text{O}_4\text{S}$ : calculated  
321 562.9706; found 562.9716. Calc  $\text{C}_{20}\text{H}_{18}\text{FIN}_2\text{O}_4\text{S}$ : C: 45.47, H: 3.43, N: 5.30; found C: 45.93,  
322 H: 3.50, N: 5.19.

323  
324 **(S)-1-(4-Iodobenzyl)-5-(2-(fluoromethyl)pyrrolidin-1-ylsulfonyl)1H-indole-2,3-dione (21)**  
325 **21** was prepared using the general method as described in 1.4.8. **13** (100 mg, 320  $\mu\text{mol}$ ) was  
326 alkylated with 4-iodobenzyl bromide (191 mg, 640  $\mu\text{mol}$ ) to yield the *title compound 21* as a  
327 yellow/orange solid (30 mg, 18%).  $^1\text{H}$  NMR (400 MHz,  $\text{CDCl}_3$ ):  $\delta$  (ppm) 8.05 (d,  $J = 1.68$   
328 Hz, 1H), 7.99 (dd,  $J_1 = 8.29$  Hz,  $J_2 = 1.70$  Hz, 1H), 7.73 (m, 2H), 7.09 (m, 2H), 6.89 (d,  $J =$   
329 8.34 Hz, 1H) 4.91 (s, 2H), 4.56-4.35 (m, 2H), 3.82 (m, 1H), 3.43 (m, 1H), 3.13 (m, 1H), 1.94  
330 (m, 2H), 1.74 (m, 2H).  $^{13}\text{C}$  NMR (100 MHz,  $\text{CDCl}_3$ ):  $\delta$  (ppm) 181.6, 157.9, 153.2, 138.6,  
331 137.6, 134.3, 133.5, 129.5, 124.8, 117.7, 111.3, 94.4, 84.4 ( $J = 173.5$  Hz), 59.0 ( $J = 22.9$  Hz),  
332 49.4, 44.1, 28.3 ( $J = 2.4$  Hz), 24.3. HPLC Purity (MeCN/100 mM  $\text{NH}_4\text{HCO}_3$  pH 8): 98.08%,  
333 20.37 min; (MeOH/ $\text{H}_2\text{O}$ /100 mM  $\text{NH}_4\text{HCO}_3$  pH 8): 97.87%, 22.94 min. LRMS ( $\text{ES}^+$ , 40 V)  
334  $m/z$   $[\text{M} + \text{H}]^+$   $\text{C}_{20}\text{H}_{19}\text{FIN}_2\text{O}_4\text{S}$ : calculated 529.01; found 528.77. HRMS (TOF MS  $\text{AP}^+$ )  $m/z$

335 [M + H]<sup>+</sup> C<sub>20</sub>H<sub>19</sub>FIN<sub>2</sub>O<sub>4</sub>S: calculated 529.0094; found 529.0106. Calc C<sub>22</sub>H<sub>22</sub>FIN<sub>2</sub>O<sub>5</sub>S: C:  
336 46.16, H: 3.87, N: 4.89; found C: 46.30, H: 3.56, N: 5.06.

337  
338 **(S)-1-(4-Methoxybenzyl)-5-(2-(fluoromethyl)pyrrolidin-1-ylsulfonyl)1H-indole-2,3-dione**  
339 **(22)**

340 **22** was prepared using the general method as described in 1.4.8. **13** (100 mg, 320 μmol) was  
341 alkylated with 4-methoxybenzyl chloride (60.8 mg, 448 μmol) to yield the *title compound 22*  
342 as a yellow solid (108 mg, 78%). <sup>1</sup>H NMR (400 MHz, CDCl<sub>3</sub>): δ (ppm) 8.03 (d, *J* = 1.79 Hz,  
343 1H), 7.98 (dd, *J*<sub>1</sub> = 8.33 Hz, *J*<sub>2</sub> = 1.91 Hz, 1H), 7.28 (m, 2H), 6.96 (m, 1H), 6.89 (m, 2H), 4.91  
344 (s, 2H), 4.57-4.35 (m, 2H), 3.82 (m, 1H), 3.78 (s, 3H), 3.43 (m, 1H), 3.11 (m, 1H), 1.93 (m,  
345 2H), 1.73 (m, 2H). <sup>13</sup>C NMR (100 MHz, CDCl<sub>3</sub>): δ (ppm) 181.9, 159.8, 157.8, 153.6, 137.3,  
346 133.7, 129.1, 125.6, 124.5, 117.6, 114.7, 111.3, 84.4 (*J* = 171.7 Hz), 58.8 (*J* = 21.3 Hz), 55.4,  
347 49.3, 44.1, 28.2 (*J* = 2.7 Hz), 24.2. HPLC Purity (MeCN/H<sub>2</sub>O/100 mM NH<sub>4</sub>HCO<sub>3</sub> pH 8):  
348 99.35%, 18.52 min; (MeOH/H<sub>2</sub>O/100 mM NH<sub>4</sub>HCO<sub>3</sub> pH 8): 96.50%, 21.34 min. LRMS (ES<sup>+</sup>,  
349 40 V) *m/z* [M + Na<sup>+</sup>] C<sub>21</sub>H<sub>21</sub>FN<sub>2</sub>NaO<sub>5</sub>S: calculated 455.11; found 455.07. HRMS (TOF MS  
350 AP<sup>+</sup>) *m/z* [M + H<sup>+</sup>] C<sub>21</sub>H<sub>22</sub>FN<sub>2</sub>O<sub>5</sub>S: calculated 433.1233; found 433.1234. Calc C<sub>21</sub>H<sub>21</sub>FN<sub>2</sub>O<sub>5</sub>S  
351 C: 58.32, H: 4.89, N: 6.48; found C: 58.40, H: 4.90, N: 6.44.

352  
353 **(S)-1-(2-Nitrobenzyl)-5-(2-(fluoromethyl)pyrrolidin-1-ylsulfonyl)1H-indole-2,3-dione**  
354 **(23)**

355 **23** was prepared using the general method as described in 1.4.8 **13** (70.7 mg, 225 μmol) was  
356 alkylated with 2-nitrobenzyl bromide (98.0 mg, 454 μmol) with an exception for the  
357 purification conditions. Upon addition of ethyl acetate, the product became suspended in the  
358 organic layer, which was evaporated to dryness. The product was purified using automated  
359 flash chromatography (Grace 40 g C18 column, 5% H<sub>2</sub>O (0.1% TFA)/MeCN for 6 column  
360 volumes, increase to 50% over 3 column volumes, 50% for 3 column volumes, increase to  
361 100% over 3 column volumes, 100% for 3 column volumes). Fractions were lyophilised to  
362 yield the *title compound 23* as a yellow/orange solid (40 mg, 40%). <sup>1</sup>H NMR (*d*<sub>6</sub>-DMSO): δ  
363 (ppm) 8.23 (dd, *J*<sub>1</sub> = 1.34 Hz, *J*<sub>2</sub> = 8.06 Hz, 1H), 8.03 (dd, *J*<sub>1</sub> = 1.32 Hz, *J*<sub>2</sub> = 8.03 Hz, 1H),  
364 7.93 (d, *J* = 1.88 Hz, 1H), 7.77 (m, 1H): 7.66 (m, 1H), 7.59 (m, 1H), 7.21 (d, *J* = 8.41 Hz,  
365 1H), 5.32 (s, 2H), 4.54-4.34 (dd, *J*<sub>1</sub> = 4.60 Hz, *J*<sub>2</sub> = 47.12 Hz, 2H), 3.86 (m, 1H), 3.11 (m,  
366 1H), 1.78 (m, 2H), 1.62 (m, 1H), 1.51 (m, 1H). <sup>13</sup>C NMR (100 MHz, *d*<sub>6</sub>-DMSO): δ (ppm)  
367 181.2, 159.2, 153.1, 147.5, 136.5, 134.3, 131.5, 130.7, 128.8, 128.0, 125.5, 122.8, 118.8,  
368 111.9, 84.8 (*J* = 170.7 Hz), 58.6 (*J* = 21.6 Hz), 49.2, 41.9, 27.5 (*J* = 2.6 Hz), 23.8. HPLC  
369 Purity (MeCN/H<sub>2</sub>O/0.1% TFA): 96.96%, 19.98 min; (MeOH/H<sub>2</sub>O/0.1% TFA): 93.95%, 20.89  
370 min. LRMS (ES<sup>-</sup>, 40 V) *m/z* [M + Cl]<sup>-</sup> C<sub>20</sub>H<sub>18</sub>ClFN<sub>3</sub>O<sub>6</sub>S: calculated 482.06; found 481.98.  
371 HRMS (TOF MS AP<sup>-</sup>) *m/z* [M - H]<sup>-</sup> C<sub>20</sub>H<sub>17</sub>FN<sub>3</sub>O<sub>6</sub>S: calculated 446.0822; found 446.0810.  
372 Calc C<sub>20</sub>H<sub>18</sub>FN<sub>3</sub>O<sub>6</sub>S: C: 53.69, H: 4.05, N: 9.39; found C: 53.40, H: 4.16, N: 9.13.

373  
374 **(S)-1-(3-Nitrobenzyl)-5-(2-(fluoromethyl)pyrrolidin-1-ylsulfonyl)1H-indole-2,3-dione**  
375 **(24)**

376 **24** was prepared using the general method as described in 1.4.8. **13** (65.6 mg, 210 μmol) was  
377 alkylated with 3-nitrobenzyl bromide (98 mg, 450 μmol) to yield the *title compound 24* as a  
378 yellow/orange solid (62 mg, 65%). <sup>1</sup>H NMR (CDCl<sub>3</sub>): δ (ppm) 8.23 (m, 2H), 8.09 (m, 1H),

379 8.03 (dd,  $J_1 = 1.92$  Hz,  $J_2 = 8.32$  Hz, 1H), 7.71 (m, 1H): 7.61 (m, 1H), 6.93 (m, 1H), 5.08 (s,  
380 2H), 4.59-4.33 (m, 2H), 3.83 (m, 1H), 3.43 (m, 1H), 3.14 (m, 1H), 1.94 (m, 2H), 1.75 (m,  
381 2H).  $^{13}\text{C}$  NMR (100 MHz,  $\text{CDCl}_3$ ):  $\delta$  (ppm) 181.2, 157.9, 152.9, 148.9, 137.7, 136.1, 134.7,  
382 133.7, 130.7, 125.0, 123.9, 122.5, 117.8, 111.0, 84.3 ( $J = 177.3$  Hz), 58.9 ( $J = 23.3$  Hz), 49.3,  
383 43.8, 28.2 ( $J = 2.5$  Hz), 24.2. HPLC Purity (MeCN/ $\text{H}_2\text{O}$ /0.1% TFA): 99.76%, 19.85 min;  
384 (MeOH/ $\text{H}_2\text{O}$ /0.1% TFA): 99.42%, 20.86 min. LRMS ( $\text{ES}^-$ , 40 V)  $m/z$   $[\text{M} + \text{Cl}]^-$   
385  $\text{C}_{20}\text{H}_{18}\text{ClFN}_3\text{O}_6\text{S}$ : calculated 482.06; found 481.95. HRMS (TOF MS  $\text{AP}^+$ )  $m/z$   $[\text{M} - \text{H}]^+$   
386  $\text{C}_{20}\text{H}_{17}\text{FN}_3\text{O}_6\text{S}$ : calculated 446.0822; found 446.0805. Calc  $\text{C}_{20}\text{H}_{18}\text{FN}_3\text{O}_6\text{S}$ : C: 53.69, H: 4.05,  
387 N, 9.39; found C: 53.72, H: 4.15, N: 9.18.

388

389 **(S)-1-(4-Nitrobenzyl)-5-(2-(fluoromethyl)pyrrolidin-1-ylsulfonyl)1H-indole-2,3-dione**  
390 **(25)**

391 **25** was prepared using the general method as described in 1.4.8 **13** (100 mg, 320  $\mu\text{mol}$ ) was  
392 alkylated with 4-nitrobenzyl bromide (138 mg, 640  $\mu\text{mol}$ ) to yield the *title compound 25* as a  
393 yellow/orange solid (40 mg, 28%).  $^1\text{H}$  NMR (400 MHz,  $\text{CDCl}_3$ ):  $\delta$  (ppm) 8.28 (d,  $J = 8.6$  Hz,  
394 2H), 8.11 (s, 1H), 8.05 (d, 1H), 7.55 (d, 2H), 6.90 (d,  $J = 8.32$  Hz, 1H) 5.10 (s, 2H), 4.58-4.40  
395 (m, 2H), 3.87 (m, 1H), 3.46 (m, 1H), 3.17 (m, 1H), 1.97 (m, 2H), 1.78 (m, 2H).  $^{13}\text{C}$  NMR  
396 (100 MHz,  $\text{CDCl}_3$ ):  $\delta$  (ppm) 181.0, 157.7, 152.7, 148.1, 140.9, 137.5, 134.6, 128.3, 124.8,  
397 124.6, 117.7, 110.9, 84.3 ( $J = 173.4$  Hz), 58.9 ( $J = 22.7$  Hz), 49.3, 43.8, 28.2 ( $J = 2.5$  Hz),  
398 24.2. HPLC Purity (MeCN/ $\text{H}_2\text{O}$ /0.1% TFA): 99.17%, 19.74 min; (MeOH/ $\text{H}_2\text{O}$ /0.1% TFA):  
399 97.61%, 21.20 min. LRMS ( $\text{ES}^+$ , 40 V)  $m/z$   $[\text{M} + \text{H}]^+$   $\text{C}_{20}\text{H}_{19}\text{FN}_3\text{O}_6\text{S}$ : calculated 448.10;  
400 found 447.90. HRMS (TOF MS  $\text{AP}^+$ )  $m/z$   $[\text{M} + \text{H}]^+$   $\text{C}_{20}\text{H}_{19}\text{FN}_3\text{O}_6\text{S}$ : calculated 448.0979;  
401 found 448.0970. Calc  $\text{C}_{20}\text{H}_{18}\text{FN}_3\text{O}_6\text{S}$ : C: 53.69, H, 4.05, N, 9.39; found C: 53.92, H:4.31, N:  
402 8.92.

403

404 **(S)-1-(1-Benzyl-5-methyl-1H-tetrazole)-5-(2-(fluoromethyl)pyrrolidin-1-ylsulfonyl)1H-**  
405 **indole-2,3-dione (26)**

406 **26** was prepared using the general method as described in 1.4.8 **13** (100.0 mg, 320  $\mu\text{mol}$ ) was  
407 alkylated with **41** (94 mg, 448  $\mu\text{mol}$ ) to yield the *title compound 26* as a yellow/orange solid  
408 (84 mg, 54%).  $^1\text{H}$  NMR (400 MHz,  $\text{CDCl}_3$ ):  $\delta$  (ppm) 8.01 (dd,  $J_1 = 8.40$  Hz,  $J_2 = 1.94$  Hz,  
409 1H), 7.89 (d,  $J = 1.83$  Hz, 1H), 7.32-7.16 (m, 5H), 7.01 (m, 1H), 5.70 (s, 2H), 5.23 (s, 2H),  
410 4.59-4.33 (m, 2H), 3.81 (m, 1H), 3.42 (m, 1H), 3.12 (m, 1H), 1.95 (m, 2H), 1.75 (m, 2H).  $^{13}\text{C}$   
411 NMR (100 MHz,  $d_6$ -acetone):  $\delta$  (ppm) 181.2, 158.2, 153.1, 150.7, 137.6, 134.6, 133.6, 129.4,  
412 127.8, 123.9, 118.4, 112.4, 85.2 ( $J = 171.2$  Hz), 59.4 ( $J = 22.7$  Hz), 51.1, 49.7, 33.2, 28.2 ( $J =$   
413  $2.8$  Hz), 24.3. HPLC Purity (MeCN/ $\text{H}_2\text{O}$ /0.1% TFA): 97.13%, 18.57 min; (MeOH/ $\text{H}_2\text{O}$ /0.1%  
414 TFA): 95.89%, 20.44 min. LRMS ( $\text{ES}^+$ , 40 V)  $m/z$   $[\text{M} + \text{H}]^+$   $\text{C}_{23}\text{H}_{23}\text{FN}_5\text{O}_4\text{S}$ : calculated  
415 485.14; found 485.24. HRMS (TOF MS  $\text{AP}^+$ )  $m/z$   $[\text{M} + \text{H}]^+$   $\text{C}_{23}\text{H}_{23}\text{FN}_5\text{O}_4\text{S}$ : calculated  
416 485.1407; found 485.1407. Calc  $\text{C}_{22}\text{H}_{21}\text{FN}_6\text{O}_4\text{S}$ : C: 54.54, H: 4.37, N: 17.35; found C: 54.13,  
417 H: 4.41, N: 18.93.

418

419 **1.4.9. Synthesis of bicyclic conformationally restricted diamine (30)**

420 **1.4.9.1. *tert*-Butyl 5-(2,3-dioxindolin-5-ylsulfonyl)hexahydropyrrolo[3,4-**  
421 **c]pyrrole-2(1*H*)-carboxylate (28)**

422 Isatin sulfonyl chloride (**12**) (501 mg, 2.04 mmol) was dissolved in a mixture of CHCl<sub>3</sub>/THF  
423 (1:1, 20 mL) at 0 °C. 2-Boc-hexahydropyrrolo[3,4-*c*]pyrrole (**27**, 476 mg, 2.24 mmol) and  
424 *N,N*-diisopropylethylamine (474 mg, 639 μL, 3.67 mmol) were dissolved in CHCl<sub>3</sub> (3 mL)  
425 and added portion-wise over 1 h at 0 °C. The reaction mixture was warmed to RT and stirred  
426 for 18 h before the solvent was removed by rotary evaporation. The residue was purified  
427 using automated flash chromatography (Grace 4 g silica column, petroleum spirit/ethyl  
428 acetate). The *title compound* **28** was obtained as an orange powder (534 mg, 62%). <sup>1</sup>H NMR  
429 (400 MHz, *d*<sub>6</sub>-DMSO): δ (ppm) 11.51 (bs, 1H), 7.99 (dd, 1H, *J*<sub>1</sub> = 8.4 Hz, *J*<sub>2</sub> = 2.0 Hz), 7.74  
430 (s, 1H), 7.11 (d, 1H, *J* = 8.0 Hz), 3.28 (m, 4H), 2.98 (m, 4H), 2.77 (bs, 2H), 1.33 (s, 9H).  
431 <sup>13</sup>C NMR (*d*<sub>6</sub>-DMSO): δ (ppm) 183.0, 159.5, 153.8, 153.4, 137.1, 129.4, 123.3, 118.1, 112.8,  
432 78.5, 52.2, 49.6, 41.6, 28.2. HPLC Purity (MeCN/H<sub>2</sub>O/0.1% TFA): 91.25%, 17.07 min;  
433 (MeOH/H<sub>2</sub>O/0.1% TFA): 87.39%, 19.96 min. LRMS (ES<sup>-</sup>, 40 V) *m/z* [M - H]<sup>-</sup> C<sub>19</sub>H<sub>22</sub>N<sub>3</sub>O<sub>6</sub>S:  
434 calculated 420.12; found 420.14. HRMS (TOF MS AP<sup>+</sup>) *m/z* [M + Na]<sup>+</sup> C<sub>19</sub>H<sub>23</sub>N<sub>3</sub>NaO<sub>6</sub>S:  
435 calculated 444.1205; found 444.1211.

436 **1.4.9.2. *tert*-Butyl 5-(1-(4-(2-fluoroethoxy)benzyl)-2,3-dioxindolin-5-**  
437 **ylsulfonyl)hexahydropyrrolo[3,4-*c*]pyrrole-2(1*H*)-carboxylate (29)**

438 **29** was prepared using the general method as described in 1.4.8. **28** (299 mg, 709 μmol) was  
439 alkylated with **37** (294 mg, 1.56 mmol) to yield the *title compound* **29** as a yellow solid (210  
440 mg, 52%). <sup>1</sup>H NMR (400 MHz, *d*<sub>6</sub>-DMSO): δ (ppm) 7.99 (dd, 1H, *J*<sub>1</sub> = 8.8 Hz, *J*<sub>2</sub> = 2.0 Hz),  
441 7.79 (d, 1H, *J* = 2.0 Hz), 7.40 (d, 2H, *J* = 8.8 Hz), 7.21 (d, 1H, *J* = 8.4 Hz), 6.94 (d, 2H, *J* =  
442 8.4 Hz), 4.89 (s, 2H), 4.73 (dt, 2H, *J*<sub>1</sub> = 47.6 Hz, *J*<sub>2</sub> = 4.0 Hz), 4.21 (dt, 2H, *J*<sub>1</sub> = 30.4 Hz, *J*<sub>2</sub> =  
443 3.6 Hz), 3.27 (m, 4H), 2.97 (m, 4H), 2.76 (bs, 2H), 1.32 (s, 9H). <sup>13</sup>C NMR (*d*<sub>6</sub>-DMSO): δ  
444 (ppm) 181.6, 158.5, 157.7, 153.3, 136.7, 130.5, 129.0, 127.3, 122.8, 118.2, 114.6, 111.6, 82.1  
445 (*J* = 166.0 Hz), 78.5, 67.0 (*J* = 11.0 Hz), 52.2, 49.7, 46.2, 42.7, 28.1. HPLC Purity  
446 (MeCN/H<sub>2</sub>O/0.1% TFA): 96.01%, 21.21 min; (MeOH/H<sub>2</sub>O/0.1% TFA): 91.99%, 22.89 min.  
447 LRMS (ES<sup>+</sup>, 40 V) *m/z* [M + Na]<sup>+</sup> calculated C<sub>26</sub>H<sub>32</sub>FN<sub>3</sub>NaO<sub>7</sub>S: 596.18; found 596.22.  
448 HRMS (TOF MS AP<sup>+</sup>) *m/z* [M + Na]<sup>+</sup> C<sub>26</sub>H<sub>32</sub>FN<sub>3</sub>NaO<sub>7</sub>S: calculated 596.1843; found  
449 596.1827.

450 **1.4.9.3. 1-(4-(2-Fluoroethoxy)benzyl)-5-(hexahydropyrrolo[3,4-*c*]pyrrol-**  
451 **2(1*H*)-ylsulfonyl)indoline-2,3-dione. TFA salt (30)**

452 **29** (146 mg, 255 μmol) was dissolved in dry CH<sub>2</sub>Cl<sub>2</sub> (3.7 mL) at RT. TFA (750 μL) was  
453 added and the reaction mixture stirred at RT for 4 h before the solvent was removed. The  
454 residue was purified using automated flash chromatography (Grace 40 g C18 column,  
455 H<sub>2</sub>O/MeCN). The *title compound* **30** was obtained as a dark yellow powder (68 mg, 45%). <sup>1</sup>H  
456 NMR (400 MHz, *d*<sub>6</sub>-DMSO): δ (ppm) 7.97 (dd, 1H, *J*<sub>1</sub> = 8.0 Hz, *J*<sub>2</sub> = 1.8 Hz), 7.77 (d, 1H, *J*  
457 = 2.0 Hz), 7.41 (d, 2H, *J* = 8.8 Hz), 7.25 (d, 1H, *J* = 8.4 Hz), 6.95 (d, 2H, *J* = 8.8 Hz), 4.90 (s,  
458 2H), 4.72 (dt, 2H, *J*<sub>1</sub> = 48.0 Hz, *J*<sub>2</sub> = 3.6 Hz), 4.21 (dt, 2H, *J*<sub>1</sub> = 30.4 Hz, *J*<sub>2</sub> = 4.0 Hz), 3.13 (m,  
459 2H), 3.00 (m, 2H), 2.92 (m, 7H). <sup>13</sup>C NMR (*d*<sub>6</sub>-DMSO): δ (ppm) 181.6, 158.4, 158.0, 153.5,  
460 137.2, 129.2, 129.1, 127.3, 123.2, 118.3, 114.7, 111.7, 82.2 (*J* = 159.0 Hz), 67.1 (*J* = 18.1  
461 Hz), 52.1, 49.9, 44.8, 42.7. HPLC Purity (MeCN/H<sub>2</sub>O/0.1% TFA): 90.16%, 14.97 min.

462 LRMS (ES<sup>+</sup>, 40 V) *m/z* [M + H]<sup>+</sup> C<sub>23</sub>H<sub>25</sub>FN<sub>3</sub>O<sub>5</sub>S: calculated 474.15; found 474.09. HRMS  
463 (TOF MS AP<sup>+</sup>) *m/z* [M + H]<sup>+</sup> C<sub>23</sub>H<sub>25</sub>FN<sub>3</sub>O<sub>5</sub>S: calculated 474.1499; found 474.1489.

### 464 1.5. <sup>18</sup>F precursor synthesis

#### 465 1.6. (S)-5-(2-(Hydroxymethyl)pyrrolidin-1-ylsulfonyl)1H-indol-2,3-dione (31)

466 **31** was synthesised using a modified literature method.<sup>11, 12</sup> **12** (5.50 g, 22.5 mmol) was  
467 suspended in CHCl<sub>3</sub>/THF (1:1, 30 mL) and chilled to 0 °C. **8** (2.30 g, 22.7 mmol) and *N,N*-  
468 diisopropylethylamine (4.38 g, 5.9 mL, 34 mmol) were dissolved in CH<sub>2</sub>Cl<sub>2</sub> (30 mL) and  
469 added dropwise over 1 h, with the reaction turning a deep red colour immediately. After 1 h at  
470 RT, TFA (3 mL) was added. The reaction mixture was concentrated and purified in multiple  
471 runs using automated flash chromatography (Grace 40 g C18 column; 5% H<sub>2</sub>O (0.1%  
472 TFA)/MeCN for 3-8 column volumes, increase to 20% over 3 column volumes, 20% for 4  
473 column volumes, increase to 100% over 3 column volumes, 100% for 4 column volumes).  
474 Fractions containing product were lyophilised to yield the *title compound 31* as a hygroscopic  
475 green solid (~ 2.0 g, 30%). <sup>1</sup>H NMR (400 MHz, *d*<sub>6</sub>-DMSO): δ (ppm) 8.00 (dd, 1H, *J*<sub>1</sub> = 8.35  
476 Hz, *J*<sub>2</sub> = 1.93 Hz), 7.75 (d, *J* = 1.99 Hz, 1H), 7.10 (d, *J* = 8.41 Hz, 1H), 4.84 (m, 1H), 3.51 (m,  
477 2H), 3.04 (m, 2H), 1.78 (m, 2H), 1.48 (m, 2H). <sup>13</sup>C NMR (*d*<sub>6</sub>-DMSO): δ (ppm) 183.1, 159.5,  
478 136.7, 130.8, 123.0, 118.2, 112.8, 63.7, 61.1, 49.2, 27.7, 23.4. HPLC Purity  
479 (MeCN/H<sub>2</sub>O/0.1% TFA): 100%, 11.18 min; (MeOH/H<sub>2</sub>O/0.1% TFA): 99.11%, 13.70 min.  
480 LRMS (ES<sup>-</sup>, 40 V) *m/z* [M - H]<sup>-</sup> C<sub>13</sub>H<sub>13</sub>N<sub>2</sub>O<sub>5</sub>S: calculated 309.05; found 309.03. HRMS (TOF  
481 MS AP<sup>-</sup>) *m/z* [M - H]<sup>-</sup> C<sub>13</sub>H<sub>13</sub>N<sub>2</sub>O<sub>5</sub>S: calculated 309.0545; found 309.0532.

482

#### 483 (S)-(1-(2,3-Dioxoindolin-5-ylsulfonyl)pyrrolidin-2-yl)methyl 4-methylbenzenesulfonate 484 (32)

485 **31** (360 mg, 1.15 mmol) was dissolved in pyridine (20 mL) at 0 °C, to which *p*-  
486 toluenesulfonyl chloride (320 mg, 2.15 mmol) was added. The reaction proceeded overnight,  
487 during which time the reaction came to RT. The reaction mixture was diluted with ethyl  
488 acetate (20 mL) and washed with 1 M HCl (20 mL), H<sub>2</sub>O (20 mL), dried (MgSO<sub>4</sub>) and  
489 evaporated to yield a thick oil, which was purified using automated flash chromatography  
490 (Grace 40 g C18 column; 5% H<sub>2</sub>O (0.1% TFA)/MeCN for 5-10 column volumes, increase to  
491 25% over 2 column volumes, 25% for 2 column volumes, increase to 100% over 2 column  
492 volumes, 100% for 2 column volumes). Fractions containing product were evaporated under  
493 reduced pressure to remove the MeCN and then lyophilised to yield the *title compound 32* a  
494 yellow solid (120 mg, 23 %). <sup>1</sup>H NMR (400 MHz, *d*<sub>6</sub>-acetone): δ (ppm) 10.52 (br s, 1H), 8.07  
495 (dd, *J*<sub>1</sub> = 8.06 Hz, *J*<sub>2</sub> = 2.00 Hz, 1H), 7.87 (m, 3H), 7.54 (d, *J* = 8.22 Hz, 2H), 7.26 (d, *J* = 8.20  
496 Hz, 2H), 7.28 (d, *J* = 8.22 Hz, 2H), 4.25 (m, 1H), 4.09 (m, 1H), 3.83 (m, 1H), 3.39 (m, 1H),  
497 3.18 (m, 1H), 2.50 (s, 3H), 2.23 (m, 1H), 1.91 (m, 1H), 1.62 (m, 2H). <sup>13</sup>C NMR (100 MHz,  
498 *d*<sub>6</sub>-acetone): δ (ppm) 182.8, 158.8, 145.3, 137.3, 133.1, 131.7, 130.1, 127.9, 123.8, 118.2,  
499 112.9, 71.6, 57.9, 49.4, 23.6, 20.7. HPLC Purity (MeCN/H<sub>2</sub>O/1% TFA): 98.81%, 19.40 min;  
500 (MeOH/H<sub>2</sub>O/0.1% TFA): 96.92%, 21.36 min. LRMS (ES<sup>+</sup>, 40 V) *m/z* [M + Na<sup>+</sup>]  
501 C<sub>20</sub>H<sub>20</sub>N<sub>2</sub>NaO<sub>7</sub>S<sub>2</sub>: calculated 487.07; found 486.96. HRMS (TOF MS AP<sup>+</sup>) *m/z* [M + H]<sup>+</sup>  
502 C<sub>20</sub>H<sub>21</sub>N<sub>2</sub>O<sub>7</sub>S<sub>2</sub>: calculated 463.0759; found 463.0541. Calc C<sub>21</sub>H<sub>21</sub>NO<sub>7</sub>S<sub>2</sub> C: 54.41, H: 4.57,  
503 N: 3.02; found C: 53.33, H: 4.76, N: 5.65.

504

505 **(S)-(1-(1-(4-Methoxybenzyl)-2,3-dioxindolin-5-ylsulfonyl)pyrrolidin-2-yl)methyl 4-**  
506 **methylbenzenesulfonate (33)**

507 **33** was prepared using the general method as described in 1.4.8. **32** (91.7 mg, 197  $\mu\text{mol}$ ) was  
508 alkylated with 4-methoxybenzyl chloride (61.7 mg, 394  $\mu\text{mol}$ ) to yield the *title compound 33*  
509 as orange crystals (59.9 mg, 52%).  $^1\text{H}$  NMR (400 MHz,  $\text{CDCl}_3$ ):  $\delta$  (ppm) 7.95 (m, 2H), 7.79  
510 (d,  $J = 8.32$  Hz, 2H), 7.38 (d,  $J = 8.00$  Hz, 2H), 7.23 (d, 2H), 6.96 (m, 1H), 6.90 (m, 2H), 4.91  
511 (s, 2H), 4.18 (m, 1H), 3.95 (m, 1H), 3.79 (s, 3H), 3.75 (m, 1H), 3.39 (m, 1H), 3.04 (m, 1H),  
512 2.47 (s, 3H), 1.88 (m, 2H), 1.69 (m, 2H).  $^{13}\text{C}$  NMR (100 MHz,  $\text{CDCl}_3$ ):  $\delta$  (ppm) 181.6, 159.7,  
513 157.7, 153.4, 145.1, 137.0, 132.7, 132.2, 129.90, 129.0, 127.8, 125.5, 124.4, 117.4, 114.6,  
514 111.5, 70.8, 57.6, 55.5, 49.3, 44.0, 28.5, 23.7, 21.6. HPLC Purity (MeCN/ $\text{H}_2\text{O}$ /100 mM  
515  $\text{NH}_4\text{HCO}_3$  pH 8): 97.38%, 20.73 min. LRMS ( $\text{ES}^+$ , 40 V)  $m/z$  [ $\text{M} + \text{H}^+$ ]  $\text{C}_{28}\text{H}_{29}\text{N}_2\text{O}_8\text{S}_2$ :  
516 calculated 585.14; found 585.01. HRMS (TOF MS  $\text{AP}^+$ )  $m/z$  [ $\text{M} + \text{H}^+$ ]  $\text{C}_{28}\text{H}_{29}\text{N}_2\text{O}_8\text{S}_2$ :  
517 calculated 585.1365; found 585.1387. Calc  $\text{C}_{28}\text{H}_{28}\text{N}_2\text{O}_8\text{S}_2$  C: 57.52, H: 4.83, N: 4.79; found  
518 C: 57.87, H: 5.19, N: 4.46.

519 **2. Enzyme inhibition assay**

520 Enzyme inhibition was conducted as per Chu *et al.*<sup>6</sup> with some modification to allow for  
521 differences in enzyme activation. Briefly, recombinant human caspase-1, -3, -6, -7 and -8,  
522 expressed in *E.coli*, were purchased from Calbiochem (San Diego, CA). The peptide specific  
523 fluorogenic substrates Ac-YVAD-AMC (caspase-1), Ac-DEVD-AMC (caspase-3, -7), and  
524 Ac-IETD-AMC (caspase-8) were purchased from Sigma-Aldrich (St. Louis, MO) while Ac-  
525 VEID-AMC (caspase-6) was purchased from Enzo Life Sciences (Farmingdale, NY).  
526 Enzymatic activity was detected by measuring the accumulation of the fluorescent product 7-  
527 amino-4-methylcoumarin (AMC). All reactions were performed at a volume of 210  $\mu\text{L}$  at  
528 37  $^\circ\text{C}$  with a final DMSO concentration of 5% under the following conditions:

- 529 • *Caspase-1*; 100 mM Na-HEPES (pH 7.4), 10% Sucrose, 100 mM NaCl, 0.1% CHAPS, 2  
530 mM EDTA, 5 mM  $\beta$ -mercaptoethanol, 10  $\mu\text{M}$  Ac-YVAD-AMC.  
531 • *Caspase-3*; 20 mM Na-HEPES (pH 7.4), 10% Sucrose, 100 mM NaCl, 0.1% CHAPS, 2  
532 mM EDTA, 10  $\mu\text{M}$  Ac-DEVD-AMC.  
533 • *Caspase-6*; 20 mM Na-HEPES (pH 7.4), 10% Sucrose, 100 mM NaCl, 0.1% CHAPS, 2  
534 mM EDTA, 5 mM  $\beta$ -mercaptoethanol, 10  $\mu\text{M}$  Ac-VEID-AMC.  
535 • *Caspase-7*; 20 mM Na-HEPES (pH 7.4), 10% Sucrose, 100 mM NaCl, 0.1% CHAPS, 2  
536 mM EDTA, 5 mM  $\beta$ -mercaptoethanol, 10  $\mu\text{M}$  Ac-DEVD-AMC.  
537 • *Caspase-8*; 20 mM Na-HEPES (pH 7.4), 10% Sucrose, 100 mM NaCl, 0.1% CHAPS, 2  
538 mM EDTA, 10  $\mu\text{M}$  Ac-IETD-AMC.

539  
540 Peptide inhibitors Ac-DEVD-CHO (caspase-3, -7), Ac-VEID-CHO (caspase-6) and Ac-  
541 IETD-CHO (caspase-8) were purchased from Sigma Aldrich while Ac-YVAD-CHO  
542 (caspase-1) was purchased from Cayman Chemicals (Ann Arbor, MI). Inhibition curves of  
543 these peptides were run alongside the compounds being tested as a control for each assay (see  
544 table below). Compounds and peptides were dissolved and serially diluted in DMSO to obtain  
545 the desired concentrations. 10  $\mu\text{L}$  was added to each well, to which was added 100  $\mu\text{L}$  of

546 enzyme solution and incubated for 30 mins at 4 °C. 100 µL of substrate solution was added to  
547 each well and incubated for up to 2 h at 37 °C. All reactions were conducted in triplicate.  
548 All assays were performed in 96 well plate format. The accumulation of AMC was measured  
549 using a Molecular Devices Spectramax M5 plate reader at excitation wavelength 350 nm and  
550 emission wavelength 450 nm. The IC<sub>50</sub> values were determined by non-linear regression  
551 analysis using the one site fit model from GraphPad Prism. All reported IC<sub>50</sub> values are the  
552 average of three or four separate assays except where results of >10000 nM were obtained. In  
553 this case only duplicates were reported.

|             | IC <sub>50</sub> (nM) |                       |                         |                       |                      |
|-------------|-----------------------|-----------------------|-------------------------|-----------------------|----------------------|
|             | Cas-1                 | Cas-3                 | Cas-6                   | Cas-7                 | Cas-8                |
| Ac-YVAD-CHO | 7.9 ± 1.8<br>(n = 18) | -                     | -                       | -                     | -                    |
| Ac-DEVD-CHO | -                     | 5.3 ± 2.3<br>(n = 17) | -                       | 5.8 ± 1.6<br>(n = 19) | -                    |
| Ac-VEID-CHO | -                     | -                     | 28.4 ± 12.3<br>(n = 13) | -                     | -                    |
| Ac-IETD-CHO | -                     | -                     | -                       | -                     | 2.8 ± 1.5<br>(n = 8) |

### 554 3. Radiochemistry

#### 555 3.1. Materials and methods

556 [<sup>18</sup>F]HF was produced on a GE PETtrace cyclotron using the <sup>18</sup>O(p, n)<sup>18</sup>F nuclear reaction  
557 (Cyclotek, Bundoora, Australia). [<sup>18</sup>F]**22** was purified by HPLC using a Waters Empower 2  
558 system with a Waters 515 pump, a Linear UVis 200 detector (λ = 254 nm) together with a  
559 Carroll and Ramsey model 105S gamma detector on a Phenomenex Luna C18 column (250 ×  
560 10 mm, 5 µm) at 2 mL/min with MeCN/H<sub>2</sub>O/TFA (80:20:0.1, v/v) as the mobile phase.  
561 Radioactivity was measured using a Capintec R15C dose calibrator.

562 Radiochemical purity was determined by HPLC using a Waters Empower 2 system with a  
563 Waters 600 controller pump, a Waters 2389 UV/Vis detector (λ = 254 nm) together with an  
564 IN/US Systems β-Ram Model 4 Detector on a Waters X Select CSH column (150 × 4.6 mm  
565 column, 5 µm) at 1 mL/min, with the mobile phase composition as follows:

|   | Time  | % H <sub>2</sub> O | % MeOH | % Formic acid<br>(1%) |
|---|-------|--------------------|--------|-----------------------|
| 1 | 0.01  | 80.0               | 10.0   | 10.0                  |
| 2 | 1.00  | 80.0               | 10.0   | 10.0                  |
| 3 | 8.00  | 0.0                | 90.0   | 10.0                  |
| 4 | 18.00 | 0.0                | 90.0   | 10.0                  |
| 5 | 18.10 | 80.0               | 10.0   | 10.0                  |

566

567

568 **(S)-1-(4-Methoxybenzyl)-5-(2-[<sup>18</sup>F]fluoromethyl)pyrrolidin-1ylsulfonyl)1H-indole-2,3-**  
569 **dione ([<sup>18</sup>F]22): General Method**

570 An aqueous H[<sup>18</sup>F] solution (200-400 MBq) was added to a 2.5 mL vial containing a solution  
571 of Kryptofix[2.2.2] (K<sub>222</sub>, 2.6 mg, 26 μL in MeCN, 2 eq.) and K<sub>2</sub>CO<sub>3</sub> (0.47 mg, 4.7 μL in  
572 H<sub>2</sub>O, 1 eq.). The solvent was evaporated under a stream of N<sub>2</sub> at 100 °C under vacuum and  
573 the residue was azeotropically dried with 3 × 1 mL anhydrous MeCN. The precursor **33** (2  
574 mg, 1 eq.) was dissolved in anhydrous MeCN (300 μL) and added to the dried K<sub>222</sub>.KF  
575 complex before being heated at 100 °C for 20 min. The reaction mixture was then treated with  
576 HCl (1 mL, 4 M) and heated at 70 °C for 5 minutes. The crude reaction mixture was purified  
577 using HPLC to yield [<sup>18</sup>F]**22** in 15 ± 0.2% radiochemical yield (*n* = 3). The identity of [<sup>18</sup>F]**22**  
578 was confirmed by co-injection with the parent compound **22** on an analytical HPLC system  
579 utilising a different mobile phase.  
580

581 **4. References**

- 582 1. R. N. Waterhouse, K. Mardon, K. M. Giles, T. L. Collier and J. C. O'Brien, *J. Med.*  
583 *Chem.*, 1997, **40**, 1657-1667.
- 584 2. K. Kopka, A. Faust, P. Keul, S. Wagner, H. Breyholz, C. Höltke, O. Schober, M.  
585 Schäfers and B. Levkau, *J. Med. Chem.*, 2006, **49**, 6704-6715.
- 586 3. G. R. Petit and S. B. Singh, *Synthesis of Dolastatin 10, United States of America Pat.*,  
587 4,978,744, 1990.
- 588 4. K. J. Barr, S. C. Berk and S. L. Buchwald, *J. Org. Chem.*, 1994, **59**, 4323-4326.
- 589 5. A. K. Podichetty, S. Wagner, A. Faust, M. Schafers, O. Schober, K. Kopka and G.  
590 Haufe, *Future Med. Chem.*, 2009, **1**, 969-989.
- 591 6. E. Chu, J. Zhang, C. Zeng, J. Rothfuss, Z. Tu, Y. Chu, D. E. Reichert, M. J. Welch  
592 and R. H. Mach, *J. Med. Chem.*, 2005, **48**, 7637-7647.
- 593 7. L. M. Havran, D. C. Chong, W. E. Childers, P. J. Dollings, A. Dietrich, B. L.  
594 Harrison, V. Marathias, G. Tawa, A. Aulabaugh, R. Cowling, B. Kapoor, W. Xu, L.  
595 Mosyak, F. Moy, W.-T. Hum, A. Wood and A. J. Robichaud, *Bioorg. Med. Chem.*,  
596 2009, **17**, 7755-7768.
- 597 8. F. Martinez and H. Naarmann, *Synthetic Met.*, 1990, **39**, 195-203.
- 598 9. I. Lee, Y. S. Choe, J. Y. Choi, K.-H. Lee and B.-T. Kim, *J. Med. Chem.*, 2012, **55**,  
599 883-892.
- 600 10. F. Touti, P. Maurin and J. Hasserodt, *Eur. J. Org. Chem.*, 2009, **2009**, 1495-1498.
- 601 11. D. Lee and S. A. Long, *Caspases and apoptosis*, WO9906367, 1999.
- 602 12. D. Lee, S. A. Long, J. D. Elliot and J. G. Gleason, *Caspases and apoptosis*,  
603 WO0122966, 2001.

604  
605
